# Supplementary material for: Animals Exposed to Leptospira Serogroups Not Included in Bacterins in the United States and Puerto Rico
Source: MDPI journal article supplement (doi:10.3390/tropicalmed8030183), 2023-03-22
Supplement: s1 [file s1]

**Table S2:** Panel of antigens used in the microscopic agglutination test (MAT).

| Species                  | Serogroup           | Serovar       | Strain         |
|--------------------------|---------------------|---------------|----------------|
| <i>L. interrogans</i>    | Australis           | Bratislava    | Jez Bratislava |
| <i>L. interrogans</i>    | Australis           | Australis     | Ballico        |
| <i>L. interrogans</i>    | Autumnalis          | Autumnalis    | Akiyami A      |
| <i>L. borgpetersenii</i> | Ballum              | Ballum        | S 102          |
| <i>L. interrogans</i>    | Bataviae            | Bataviae      | Van Tienen     |
| <i>L. interrogans</i>    | Canicola            | Canicola      | H. Utrecht IV  |
| <i>L. interrogans</i>    | Grippotyphosa       | Grippotyphosa | Andaman        |
| <i>L. interrogans</i>    | Hebdomadis          | Hebdomadis    | Hebdomadis     |
| <i>L. interrogans</i>    | Icterohaemorrhagiae | Copenhageni   | M 20           |
| <i>L. interrogans</i>    | Mini                | Szwajizak     | Szwajizak      |
| <i>L. interrogans</i>    | Pomona              | Pomona        | Pomona         |
| <i>L. interrogans</i>    | Pyrogenes           | Pyrogenes     | Salinem        |
| <i>L. interrogans</i>    | Sejroe              | Hardjo        | Hardjoprajitno |
| <i>L. borgpetersenii</i> | Sejrøe              | Sejrøe        | M 84           |
| <i>L. borgpetersenii</i> | Tarassovi           | Tarassovi     | Perepelitsin   |
